# Supplementary material
Source: Springer Nature journal article supplement (https://www.springermedizin.de/resource/supplementary/12879_2012_1990_MOESM4_ESM.pdf/9443488)

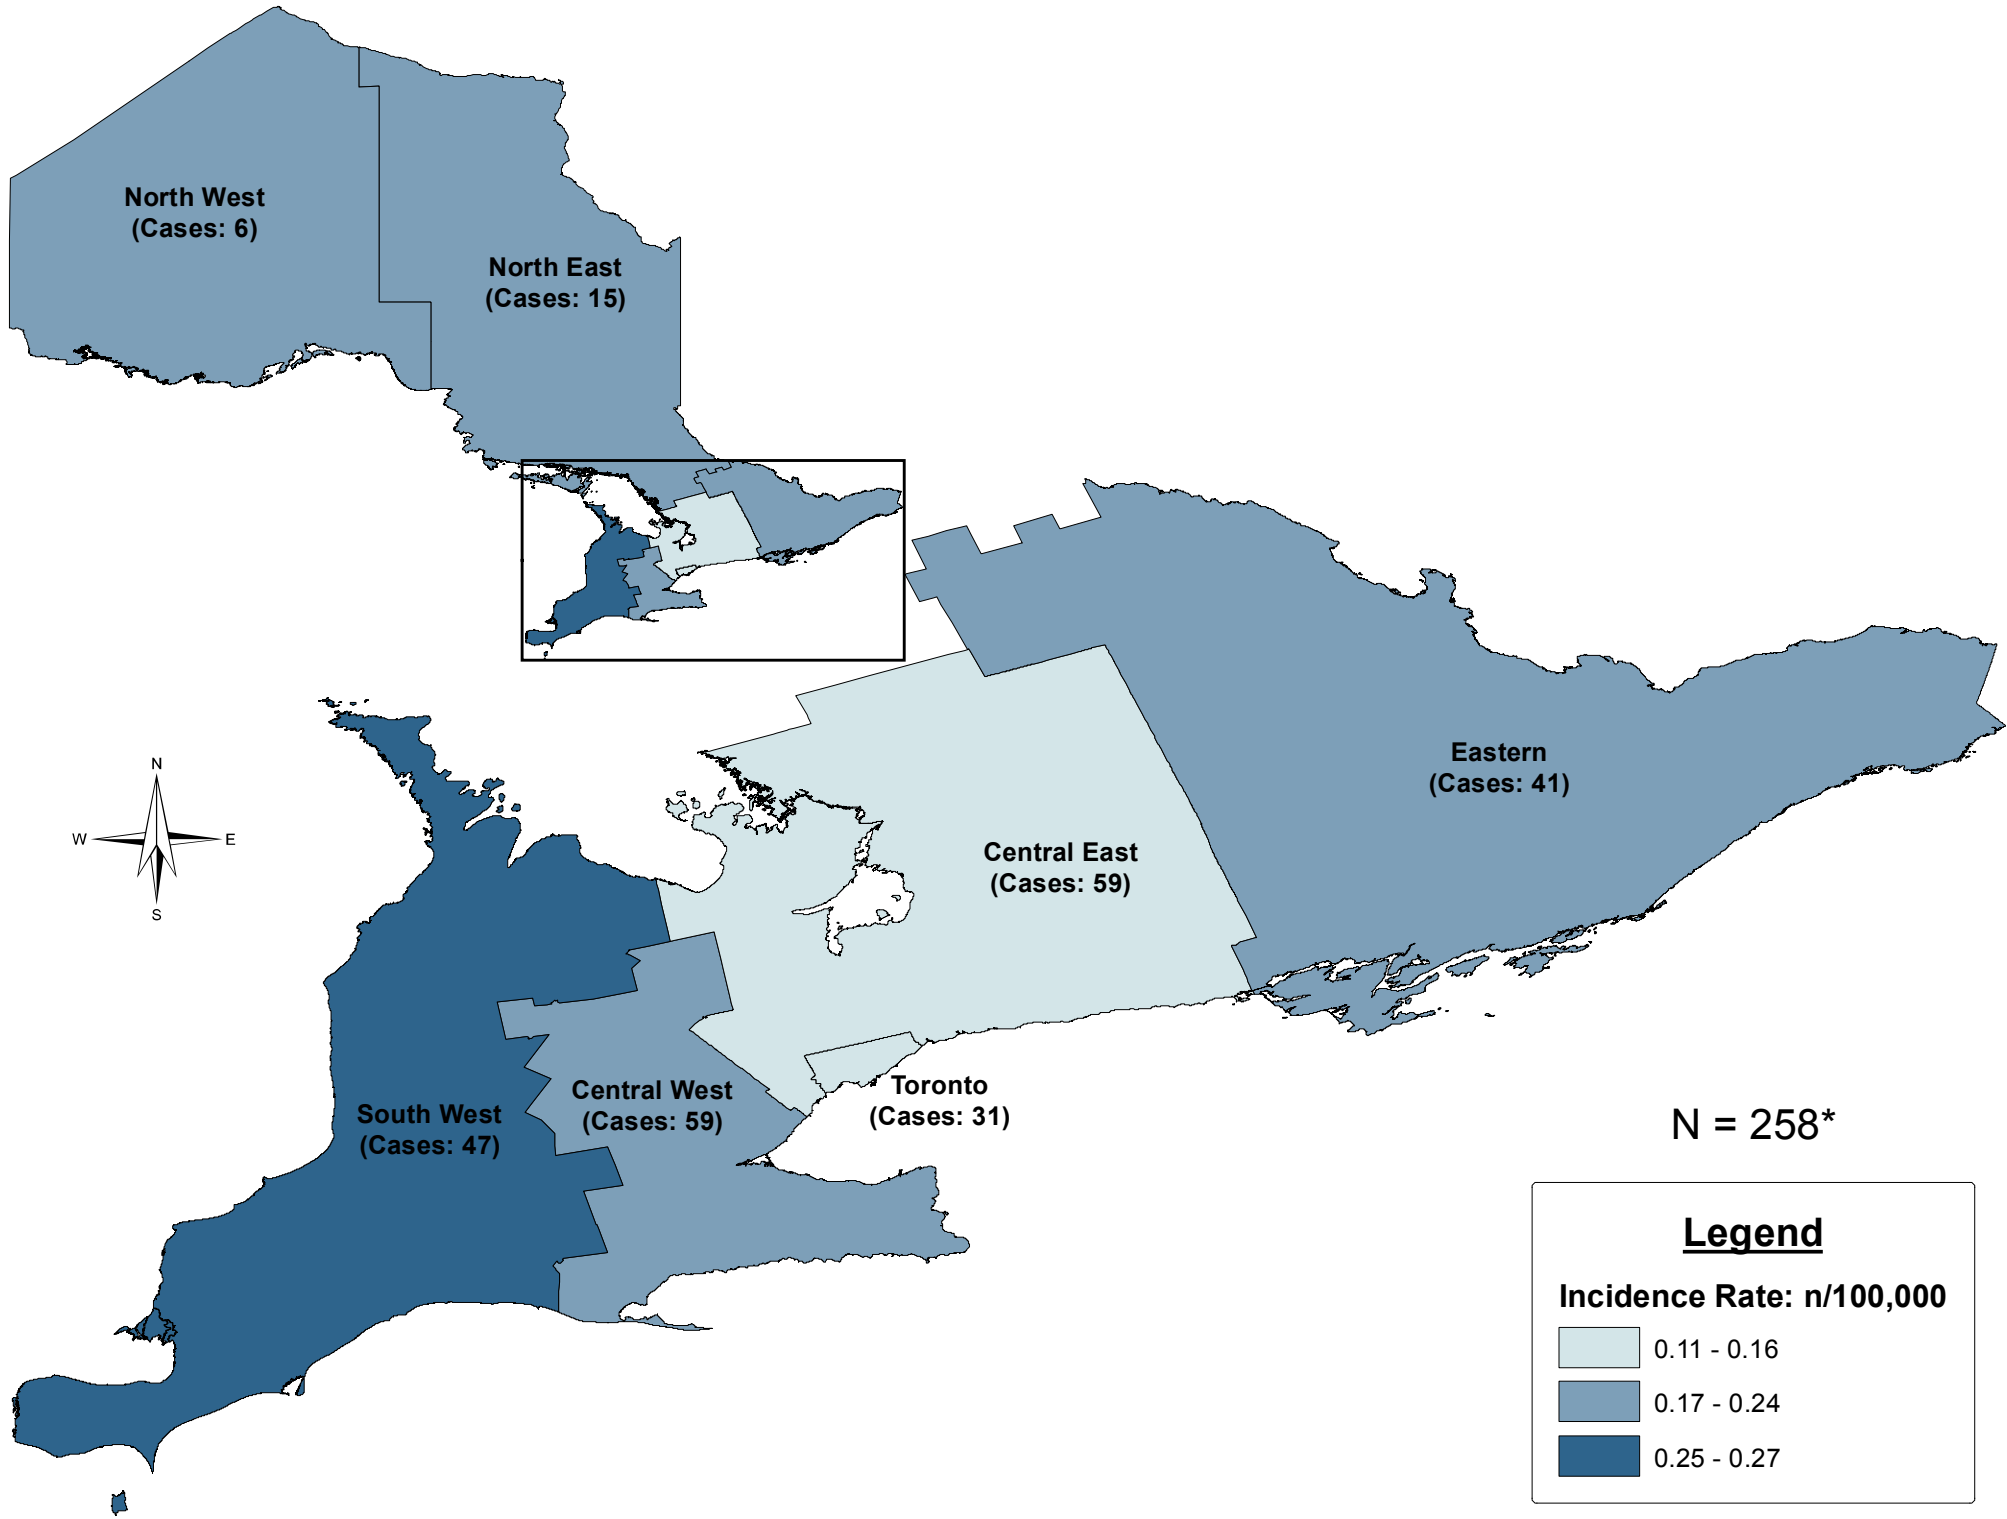

N = 258\*

**Legend**

**Incidence Rate: n/100,000**

- 0.11 - 0.16
- 0.17 - 0.24
- 0.25 - 0.27

Supplement: MOESM4 [file 9443488]
